# Supplementary material for: Association between Add-On Dipeptidyl Peptidase-4 Inhibitor Therapy and Diabetic Retinopathy Progression
Source: MDPI journal article supplement (doi:10.3390/jcm10132871), 2021-06-28
Supplement: s1 [file s1]

**Table S1.** ICD-9 CM diagnostic codes

| Variable                           | ICD-9 CM Code                                                                                                                                                |
|------------------------------------|--------------------------------------------------------------------------------------------------------------------------------------------------------------|
| Diabetes mellitus                  | 250.xx                                                                                                                                                       |
| Type 1 diabetes mellitus           | 25001, 25003, 25011, 25013, 25021, 25023, 25031, 25033, 25041, 25043, 25051, 25053, 25061, 25063, 25071, 25073, 25081, 25083, 25091, 25093                   |
| Diabetic retinopathy               | 362.0x                                                                                                                                                       |
| Retinal vascular occlusion         | 362.3x                                                                                                                                                       |
| Separation of retinal layers       | 361.xx, 362.4x                                                                                                                                               |
| Retina degeneration                | 362.5x, 362.6x, 362.7x                                                                                                                                       |
| Chorioretinal inflammation         | 363.0x, 363.1x, 363.2x                                                                                                                                       |
| Other retinal disorders            | 362.8x, 379.23                                                                                                                                               |
| Proliferative diabetic retinopathy | 362.02                                                                                                                                                       |
| Diabetic macula oedema             | 362.53, 362.07                                                                                                                                               |
| Hypertension                       | 401.xx-405.xx                                                                                                                                                |
| Atrial fibrillation                | 427.31                                                                                                                                                       |
| Dyslipidemia                       | 272.xx                                                                                                                                                       |
| Ischemic heart disease             | 410.xx-414.xx                                                                                                                                                |
| Heart failure                      | 428.xx                                                                                                                                                       |
| Chronic kidney disease             | 580.xx-589.xx, 403.xx-404.xx, 016.0x, 095.4x, 236.9x, 250.4x, 274.1x, 442.1x, 447.3x, 440.1x, 572.4x, 642.1x, 646.2x, 753.1x, 283.11, 403.01, 404.02, 446.21 |
| Dialysis                           | 585.xx (Catastrophic illness card)                                                                                                                           |
| Peripheral arterial disease        | 440.0x, 440.2x, 440.3x, 440.8x, 440.9x, 443.xx, 444.0x, 444.22, 444.8x, 447.8x, and 447.9x                                                                   |
| Diabetic neuropathy                | 250.6x, 357.2x                                                                                                                                               |
| Diabetic foot ulcer                | 250.7x, 785.4x                                                                                                                                               |
| Vitreous haemorrhage               | 379.23, 362.81                                                                                                                                               |
| Tractional retinal detachment      | 361.0x, 361.8x, 361.9x                                                                                                                                       |
| Myocardial infarction              | 410.xx                                                                                                                                                       |
| Heart failure                      | 428.xx                                                                                                                                                       |
| Ischemic stroke                    | 433.xx, 434.xx, 435.xx, 436.xx, 437.xx                                                                                                                       |
| Haemorrhage stroke                 | 430.xx, 431.xx, 432.xx                                                                                                                                       |

ICD-9 CM, International Classification of Diseases, Ninth Revision, Clinical Modification.
